# Supplementary material for: Analysis of Stop-Gain and Frameshift Variants in Human Innate Immunity Genes
Source: PLoS Comput Biol. 2014 Jul 24;10(7):e1003757. doi: 10.1371/journal.pcbi.1003757 (PMC4110073; doi:10.1371/journal.pcbi.1003757)
Supplement: Table S1 — Distribution of variants according to allele frequency and dataset. Number of variants included in the study is reported in total and according to their original dataset: the NHLBI GO Exome Sequencing Project (ESP) and the 1000 Genomes Project. Distribution is shown according to variant type and minor allele frequency intervals and the number of genes bearing each type of variants is reported. (XLSX) [file pcbi.1003757.s008.xlsx]

## Sheet: ST1
Table S1. Distribution of variants according to allele frequency and dataset
Variant type	Minor Allele Frequency Intervals					Total # variants	# variants from ESP project	# variants from 1000 Genomes	# Genes affected
	Singletons	<0.001	[0.001-0.01)	[0.01-0.05)	>0.05
stop-gained	12923	3896	820	82	43	17764	14938	4418	8573
frameshift	8828	3494	1268	258	67	13915	13764	279	7713
missense	458365	207972	62970	9938	4549	743794	622800	233396	17561
coding-synonymous	238664	131669	49882	9201	5257	434673	366222	156487	17504
