# Supplementary material for: Analysis of Stop-Gain and Frameshift Variants in Human Innate Immunity Genes
Source: PLoS Comput Biol. 2014 Jul 24;10(7):e1003757. doi: 10.1371/journal.pcbi.1003757 (PMC4110073; doi:10.1371/journal.pcbi.1003757)
Supplement: Table S4 — Sequence features and pathogenicity scores of gene truncating variants in antiviral interferon stimulated genes. Table shows figures for 15 stop-gain and 7 frameshift variants affecting 13 of 42 genes with anti-viral activity in cellular assays [9] [10]. Analysis was restricted to variants identified in at least two individuals. Variants are ranked according to their sequence-based pathogenicity score. High-scoring variants affecting MX1 and HPSE are highlighted in violet and green respectively and discussed in the main text. (XLSX) [file pcbi.1003757.s011.xlsx]

## Sheet: ST3
Supplementary Table S4. Sequence features and pathogenicity scores of stop-gain and frameshift variants in antiviral interferon stimulated genes.
Chromosome:Coordinate	Alleles (Reference > Alternative)	dbSNP ID	Total # Homozygous	Total # Heterozygous	# Homozygous EPS Project	# Heterozygous EPS Project	# Homozygous 1000 Genomes Project	# Heterozygous 1000 Genomes Project	Minor Allele Frequency	Gene Name	Predicted effect	Mapping > 50 nt upstream the last exon-exon junction (*)	# Isoforms annotated in CCDS	Affecting all Isoforms annotated in CCDS	Affecting Principal Isoform	Maximum percentage of truncation of a domain	% of transcript length truncated	Sequence-based rank percentile	Gene-based rank percentile	Gene expression level of individuals baring the variant (average z-score of the total distribution)	Virus restricted (Schoggins et al. Nature 2011 and Schoggins et al. Nature 2013)
4:84240539	G>A	-	-	2	-	2	-	-	0.000154	HPSE	stop-gained	YES	3	YES	YES	1	0.719975	1.94732	11.9349	NA	EAV, HMPV, RSV, YFV
4:84502765	C>T	rs149617166	-	6	-	6	-	-	0.000461	AGPAT9	stop-gained	YES	1	YES	YES	1	0.801533	15.0383	53.6745	NA	SINV-A
11:60714017	G>A	rs116597710	-	14	-	10	-	4	0.000922	SLC15A3	stop-gained	YES	1	YES	YES	1	0.521764	24.5498	80.7324	-0.204631	SINV-G, SINV-A, CHIKV
21:42818050	G>T	rs35132725	-	12	-	11	-	1	0.00079	MX1	stop-gained	YES	1	YES	YES	1	0.36903	28.3769	5.8612	-1,58 (**)	FLUAV
11:60711167	G>C	-	-	2	-	2	-	-	0.000154	SLC15A3	stop-gained	YES	1	YES	YES	0.886364	0.43299	33.2058	80.7406	NA	SINV-G, SINV-A, CHIKV
12:113444334	C>T	rs142538466	-	2	-	2	-	-	0.000154	OAS2	stop-gained	YES	3	NO	NA	0.825397	0.266204	36.4194	68.0046	NA	EAV
15:81614805	G>A	rs183104251	-	2	-	-	-	2	0.000916	STARD5	stop-gained	YES	1	YES	YES	0.666667	0.647975	36.6614	57.0179	NA	SINV-G
4:84223334	G>A	rs141973931	-	6	-	3	-	3	0.000395	HPSE	stop-gained	YES	3	YES	YES	0	0.207108	46.4768	11.9104	0,01 (**)	EAV, HMPV, RSV, YFV
5:131822691	G>A	rs146963938	-	2	-	2	-	-	0.000154	IRF1	stop-gained	YES	1	YES	YES	0.0701754	0.673824	47.8163	58.2441	NA	HCV, HIV-1, YFV, WNV, VEEV, CHIKV, PV, EAV, SINV-G, SINV-A, ONNV, FLUAV ,PIV3
13:43500565	G>C	rs115506182	-	45	-	40	-	5	0.00296	EPSTI1	stop-gained	YES	2	YES	YES	NA	0.542579	50.9624	95.8146	-1.39882	PV
13:43469222	G>A	rs201385523	-	2	-	2	-	-	0.000154	EPSTI1	stop-gained	YES	2	YES	YES	NA	0.293593	58.3746	95.8228	NA	PV
22:36661290	C>A	-	-	2	-	2	-	-	0.000154	APOL1	stop-gained	NO	3	YES	YES	NA	0.633735	78.9003	NaN	NA	SINV-A
4:84216649	G>A	rs144185023	-	22	-	19	-	3	0.00145	HPSE	stop-gained	NO	3	YES	YES	0	0.0931373	80.4818	11.9268	1,81 (**)	EAV, HMPV, RSV, YFV
20:56185229	C>A	-	-	2	-	2	-	-	0.000154	ZBP1	stop-gained	NO	3	NO	NA	0	0.171318	96.9327	97.1716	NA	PV, CVB, SINV-A, ONNV
14:55251159	C>T	rs200605562	-	7	-	7	-	-	0.00153	SAMD4A	stop-gained	YES	3	NO	NA	NA	0.114644	98.5086	55.2277	NA	ONNV
21:42811713	A>AT	-	-	2	-	2	-	-	0.00016	MX1	frameshift	YES	1	YES	YES	1	0.733534	17.1118	5.9154	NA	FLUAV
21:42815790	CTG>C	-	-	5	-	5	-	-	0.000399	MX1	frameshift	YES	1	YES	YES	1	0.494218	25.1614	5.926	NA	FLUAV
6:82461485	GCTGCC>G	-	-	34	-	34	-	-	0.0028	FAM46A	frameshift	YES	1	YES	YES	0.815047	0.719338	27.0766	64.1683	NA	FLUAV
12:113442773	CTG>C	-	-	15	-	15	-	-	0.0012	OAS2	frameshift	YES	3	NO	NA	1	0.4375	27.7077	66.7444	NA	EAV
15:42192889	T>TG	rs145578237	-	26	-	26	-	-	0.00208	EHD4	frameshift	NO	1	YES	YES	0.0947368	0.0289053	88.5677	47.8321	NA	SINV-G
21:42830677	C>CCCGGTTAA	rs199916658	1	78	1	61	-	17	0.00544	MX1	frameshift	NO	1	YES	YES	0.0224719	0.00351936	93.7335	5.9048	0,14 (**)	FLUAV
13:43463359	G>GA	-	-	20	-	20	-	-	0.0016	EPSTI1	frameshift	NO	2	NO	YES	NA	0.215734	97.8794	95.9822	NA	PV
(*) Transcripts bearing a stop-gain >50 nt from the last exon-exon junction are predicted to be degraded by NMD
(**) Expression data provided in attached sheet
NA = Not available
CHIKV: chikungunya virus
CVB: Coxsackie B virus
EAV: equine arterivirus
FLUAV: influenza A virus
HCV: Hepatatis C virus
HIV-1: Human immunodeficiency virus 1
HMPV: human metapneumovirus
MV: measles virus
NDV: Newcastle disease virus
ONNV: o’nyong-nyong virus
PIV3: human parainfluenza virus type 3
PV: poliovirus
RSV: respiratory syncytial virus
SINV-A: Sindbis virus AR86
SINV-G: Sindbis virus Girdwood
VEEV: Venezuelan equine encephalitis virus
WNV: West Nile virus
YFV: yellow fever virus

## Sheet: EXPRESSION DATA
Individual ID	MX1 - Peer-factor normalized RPKM values	rs141973931 - Individual genoptypes	rs144185023 - Individual genoptypes	HPSE- Peer-factor normalized RPKM values	rs199916658 - Individual genoptypes	rs35132725 - Individual genoptypes
HG00096	223.767	HG00096=0|0	HG00096=0|0	1.40291	HG00096=0|0	HG00096=0|0
HG00097	234.752	HG00097=0|0	HG00097=0|0	0.463602	HG00097=0|0	HG00097=0|0
HG00099	124.786	HG00099=0|0	HG00099=0|0	0.783656	HG00099=0|0	HG00099=0|0
HG00100	238.971	HG00100=0|0	HG00100=0|0	0.844223	HG00100=0|0	HG00100=0|0
HG00101	212.023	HG00101=0|0	HG00101=0|0	0.425377	HG00101=0|0	HG00101=0|0
HG00102	276.945	HG00102=0|0	HG00102=0|0	1.13564	HG00102=0|0	HG00102=0|0
HG00103	259.977	HG00103=0|0	HG00103=0|0	0.608482	HG00103=0|0	HG00103=0|0
HG00104	251.795	HG00104=0|0	HG00104=0|0	0.193863	HG00104=0|0	HG00104=0|0
HG00106	251.306	HG00106=0|0	HG00106=0|0	2.20303	HG00106=0|0	HG00106=0|0
HG00108	223.412	HG00108=0|0	HG00108=0|0	0.570054	HG00108=0|0	HG00108=0|0
HG00109	237.348	HG00109=0|0	HG00109=0|0	2.3226	HG00109=0|0	HG00109=0|0
HG00110	253.743	HG00110=0|0	HG00110=0|0	0.621427	HG00110=0|0	HG00110=0|0
HG00111	242.614	HG00111=0|0	HG00111=0|0	0.338681	HG00111=0|0	HG00111=0|0
HG00112	250.211	HG00112=0|0	HG00112=0|0	1.29477	HG00112=0|0	HG00112=0|0
HG00114	306.268	HG00114=0|0	HG00114=0|0	0.607293	HG00114=0|0	HG00114=0|0
HG00116	327.881	HG00116=0|0	HG00116=0|0	1.10456	HG00116=0|0	HG00116=0|0
HG00117	248.31	HG00117=0|0	HG00117=0|0	0.852431	HG00117=0|0	HG00117=0|0
HG00118	400.289	HG00118=0|0	HG00118=0|0	0.667181	HG00118=0|0	HG00118=0|0
HG00119	221.206	HG00119=0|0	HG00119=0|0	1.23514	HG00119=0|1	HG00119=0|0
HG00120	210.271	HG00120=0|0	HG00120=0|0	0.36126	HG00120=0|0	HG00120=0|0
HG00121	153.025	HG00121=0|0	HG00121=0|0	1.37408	HG00121=0|0	HG00121=0|0
HG00122	166.24	HG00122=0|0	HG00122=0|0	0.766206	HG00122=0|0	HG00122=0|0
HG00123	337.75	HG00123=0|0	HG00123=0|0	0.868019	HG00123=0|0	HG00123=0|0
HG00124	283.706	HG00124=0|0	HG00124=0|0	0.567092	HG00124=1|0	HG00124=0|0
HG00125	193.303	HG00125=0|0	HG00125=0|0	0.999085	HG00125=0|0	HG00125=0|0
HG00126	254.616	HG00126=0|0	HG00126=0|0	1.47295	HG00126=0|0	HG00126=0|0
HG00127	263.966	HG00127=0|0	HG00127=0|0	0.270132	HG00127=0|0	HG00127=0|0
HG00128	198.471	HG00128=0|0	HG00128=0|0	0.207264	HG00128=0|0	HG00128=0|0
HG00129	261.556	HG00129=0|0	HG00129=0|0	0.829836	HG00129=0|0	HG00129=0|0
HG00130	307.998	HG00130=0|0	HG00130=0|0	0.200255	HG00130=0|0	HG00130=0|0
HG00131	293.623	HG00131=0|0	HG00131=0|0	0.890513	HG00131=0|0	HG00131=0|0
HG00133	359.745	HG00133=0|0	HG00133=0|0	0.552044	HG00133=0|0	HG00133=0|0
HG00134	201.241	HG00134=0|0	HG00134=0|0	1.24794	HG00134=0|0	HG00134=0|0
HG00135	357.334	HG00135=0|0	HG00135=0|0	0.604988	HG00135=0|0	HG00135=0|0
HG00136	314.514	HG00136=0|0	HG00136=0|0	0.629075	HG00136=0|0	HG00136=0|0
HG00137	240.611	HG00137=0|0	HG00137=0|0	1.72561	HG00137=0|0	HG00137=0|0
HG00138	190.068	HG00138=0|0	HG00138=0|0	0.984296	HG00138=0|0	HG00138=0|0
HG00139	264.187	HG00139=0|0	HG00139=0|0	1.2268	HG00139=0|0	HG00139=0|0
HG00141	300.964	HG00141=0|0	HG00141=0|0	1.29918	HG00141=0|0	HG00141=0|0
HG00142	253.695	HG00142=0|0	HG00142=0|0	0.516321	HG00142=0|0	HG00142=0|0
HG00143	191.643	HG00143=0|0	HG00143=0|0	0.339603	HG00143=0|0	HG00143=0|0
HG00146	216.122	HG00146=0|0	HG00146=0|0	0.357112	HG00146=0|0	HG00146=0|0
HG00148	277.012	HG00148=0|0	HG00148=0|0	0.544014	HG00148=0|0	HG00148=0|0
HG00149	251.124	HG00149=0|0	HG00149=0|0	0.364156	HG00149=0|0	HG00149=0|0
HG00150	285.1	HG00150=0|0	HG00150=0|0	0.64148	HG00150=0|0	HG00150=0|0
HG00151	208.93	HG00151=0|0	HG00151=0|0	0.974672	HG00151=0|0	HG00151=0|0
HG00152	219.614	HG00152=0|0	HG00152=0|0	0.678432	HG00152=0|0	HG00152=0|0
HG00154	282.113	HG00154=0|0	HG00154=0|0	1.0538	HG00154=0|0	HG00154=0|0
HG00155	186.756	HG00155=0|0	HG00155=0|0	1.01069	HG00155=0|0	HG00155=0|0
HG00156	219.215	HG00156=0|0	HG00156=0|0	0.352296	HG00156=0|0	HG00156=0|0
HG00158	272.357	HG00158=0|0	HG00158=0|0	0.711077	HG00158=0|0	HG00158=0|0
HG00159	183.064	HG00159=0|0	HG00159=0|0	0.625506	HG00159=0|0	HG00159=0|0
HG00160	188.219	HG00160=0|0	HG00160=0|0	0.745421	HG00160=0|0	HG00160=0|0
HG00171	208.461	HG00171=0|0	HG00171=0|0	0.805386	HG00171=0|0	HG00171=0|0
HG00173	259.012	HG00173=0|0	HG00173=0|0	0.397148	HG00173=0|0	HG00173=0|0
HG00174	261.213	HG00174=0|0	HG00174=0|0	0.853206	HG00174=0|0	HG00174=0|0
HG00176	212.799	HG00176=0|0	HG00176=0|0	0.730892	HG00176=0|0	HG00176=0|0
HG00177	234.749	HG00177=0|0	HG00177=0|0	0.70506	HG00177=0|0	HG00177=0|0
HG00178	187.594	HG00178=0|0	HG00178=0|0	0.718058	HG00178=0|0	HG00178=0|0
HG00179	253.426	HG00179=0|0	HG00179=0|0	0.117951	HG00179=0|0	HG00179=0|0
HG00180	243.554	HG00180=0|0	HG00180=0|0	0.333503	HG00180=0|0	HG00180=0|0
HG00182	208.731	HG00182=0|0	HG00182=0|0	0.295919	HG00182=0|0	HG00182=0|0
HG00183	177.816	HG00183=0|0	HG00183=0|0	1.46613	HG00183=0|0	HG00183=0|0
HG00185	242.927	HG00185=0|0	HG00185=0|0	0.567249	HG00185=0|0	HG00185=0|0
HG00186	252.479	HG00186=0|0	HG00186=0|0	0.51321	HG00186=0|0	HG00186=0|0
HG00187	204.386	HG00187=0|0	HG00187=0|0	0.848062	HG00187=0|0	HG00187=0|0
HG00188	271.787	HG00188=0|0	HG00188=0|0	0.570586	HG00188=0|0	HG00188=0|0
HG00189	223.302	HG00189=0|0	HG00189=0|0	0.551269	HG00189=0|0	HG00189=0|0
HG00231	306.459	HG00231=0|0	HG00231=0|0	0.353885	HG00231=0|0	HG00231=0|0
HG00232	191.808	HG00232=0|0	HG00232=0|0	0.34315	HG00232=0|0	HG00232=0|0
HG00233	173.346	HG00233=0|0	HG00233=0|0	0.713869	HG00233=0|0	HG00233=0|0
HG00234	159.208	HG00234=0|0	HG00234=0|0	0.297769	HG00234=0|0	HG00234=0|0
HG00235	174.018	HG00235=0|0	HG00235=0|0	0.677762	HG00235=0|0	HG00235=0|0
HG00236	223.243	HG00236=0|0	HG00236=0|0	0.209442	HG00236=0|0	HG00236=0|0
HG00238	200.915	HG00238=0|0	HG00238=0|0	0.783888	HG00238=0|0	HG00238=0|0
HG00239	178.571	HG00239=0|0	HG00239=0|0	0.651985	HG00239=0|0	HG00239=0|0
HG00240	306.919	HG00240=0|0	HG00240=0|0	0.322161	HG00240=0|0	HG00240=0|0
HG00242	236.428	HG00242=0|0	HG00242=0|0	0.984076	HG00242=0|0	HG00242=0|0
HG00243	238.985	HG00243=0|0	HG00243=0|0	0.725201	HG00243=0|0	HG00243=0|0
HG00244	187.938	HG00244=0|0	HG00244=0|0	0.268208	HG00244=0|0	HG00244=0|0
HG00245	241.21	HG00245=0|0	HG00245=0|0	0.554298	HG00245=0|0	HG00245=0|0
HG00246	263.646	HG00246=0|0	HG00246=0|0	0.720753	HG00246=0|0	HG00246=0|0
HG00247	234.313	HG00247=0|0	HG00247=0|0	0.946616	HG00247=0|0	HG00247=0|0
HG00249	167.811	HG00249=0|0	HG00249=0|0	0.156359	HG00249=0|0	HG00249=0|0
HG00250	185.361	HG00250=0|0	HG00250=0|0	0.0687528	HG00250=0|0	HG00250=0|0
HG00251	178.589	HG00251=0|0	HG00251=0|0	0.574895	HG00251=0|0	HG00251=0|0
HG00252	217.564	HG00252=0|0	HG00252=0|0	0.316556	HG00252=0|0	HG00252=0|0
HG00253	312.409	HG00253=0|0	HG00253=0|0	0.41698	HG00253=0|0	HG00253=0|0
HG00255	213.775	HG00255=0|0	HG00255=0|0	0.263255	HG00255=0|0	HG00255=0|0
HG00256	294.255	HG00256=0|0	HG00256=0|0	0.947859	HG00256=0|0	HG00256=0|0
HG00257	237.388	HG00257=0|0	HG00257=0|0	1.85925	HG00257=0|0	HG00257=0|0
HG00258	408.974	HG00258=0|0	HG00258=0|0	0.558659	HG00258=0|0	HG00258=0|0
HG00259	199.582	HG00259=0|0	HG00259=0|0	0.38995	HG00259=0|0	HG00259=0|0
HG00260	216.275	HG00260=0|0	HG00260=0|0	0.819843	HG00260=0|0	HG00260=0|0
HG00261	261.711	HG00261=0|0	HG00261=0|0	0.665	HG00261=0|0	HG00261=0|0
HG00262	283.776	HG00262=0|0	HG00262=0|0	0.928009	HG00262=0|0	HG00262=0|0
HG00263	158.632	HG00263=0|0	HG00263=0|0	0.304027	HG00263=0|0	HG00263=0|0
HG00264	283.665	HG00264=0|0	HG00264=0|0	0.565659	HG00264=0|0	HG00264=0|0
HG00265	284.444	HG00265=0|0	HG00265=0|0	1.36796	HG00265=0|0	HG00265=0|0
HG00266	222.699	HG00266=0|0	HG00266=0|0	1.02103	HG00266=0|0	HG00266=0|0
HG00267	275.612	HG00267=0|0	HG00267=0|0	0.847754	HG00267=0|0	HG00267=0|0
HG00268	195.015	HG00268=0|0	HG00268=0|0	0.541873	HG00268=0|0	HG00268=0|0
HG00269	236.15	HG00269=0|0	HG00269=0|0	0.666049	HG00269=0|0	HG00269=0|0
HG00271	202.543	HG00271=0|0	HG00271=0|0	0.60909	HG00271=0|0	HG00271=0|0
HG00272	237.092	HG00272=0|0	HG00272=0|0	0.740734	HG00272=0|0	HG00272=0|0
HG00273	230.459	HG00273=0|0	HG00273=0|0	0.811981	HG00273=0|0	HG00273=0|0
HG00274	184.196	HG00274=0|0	HG00274=0|0	0.497963	HG00274=0|0	HG00274=0|0
HG00275	236.418	HG00275=0|0	HG00275=0|0	0.624449	HG00275=0|0	HG00275=0|0
HG00276	264.362	HG00276=0|0	HG00276=0|0	0.47731	HG00276=0|0	HG00276=0|0
HG00277	168.496	HG00277=0|0	HG00277=0|0	0.38692	HG00277=0|0	HG00277=0|0
HG00278	208.825	HG00278=0|0	HG00278=0|0	0.804455	HG00278=0|0	HG00278=0|0
HG00280	182.636	HG00280=0|0	HG00280=0|0	0.728403	HG00280=0|0	HG00280=0|0
HG00281	196.552	HG00281=0|0	HG00281=0|0	0.499676	HG00281=0|0	HG00281=0|0
HG00282	195.775	HG00282=0|0	HG00282=0|0	1.00852	HG00282=0|0	HG00282=0|0
HG00284	222.69	HG00284=0|0	HG00284=0|0	0.364399	HG00284=0|0	HG00284=0|0
HG00285	207.058	HG00285=0|0	HG00285=0|0	0.408847	HG00285=0|0	HG00285=0|0
HG00306	199.786	HG00306=0|0	HG00306=0|0	0.703345	HG00306=0|0	HG00306=0|0
HG00309	231.524	HG00309=0|0	HG00309=0|0	0.260092	HG00309=0|0	HG00309=0|0
HG00310	262.693	HG00310=0|0	HG00310=0|0	0.938977	HG00310=0|0	HG00310=0|0
HG00311	270.146	HG00311=0|0	HG00311=0|0	0.965716	HG00311=0|0	HG00311=0|0
HG00312	147.327	HG00312=0|0	HG00312=0|0	0.48053	HG00312=0|0	HG00312=0|0
HG00313	214.006	HG00313=0|0	HG00313=0|0	0.142307	HG00313=0|0	HG00313=0|0
HG00315	219.193	HG00315=0|0	HG00315=0|0	0.343184	HG00315=0|0	HG00315=0|0
HG00319	252.84	HG00319=0|0	HG00319=0|0	0.40913	HG00319=0|0	HG00319=0|0
HG00320	230.753	HG00320=1|0	HG00320=0|0	0.800872	HG00320=0|0	HG00320=0|0
HG00321	250.13	HG00321=0|0	HG00321=0|0	0.910128	HG00321=0|0	HG00321=0|0
HG00323	165.734	HG00323=0|0	HG00323=0|0	1.0757	HG00323=0|0	HG00323=0|0
HG00324	135.998	HG00324=0|0	HG00324=0|0	0.772543	HG00324=0|0	HG00324=0|0
HG00325	177.953	HG00325=0|0	HG00325=0|0	0.558453	HG00325=0|0	HG00325=0|0
HG00326	199.528	HG00326=0|0	HG00326=0|0	0.277958	HG00326=0|0	HG00326=0|0
HG00327	121.941	HG00327=0|0	HG00327=0|0	0.141032	HG00327=0|0	HG00327=0|0
HG00328	165.662	HG00328=0|0	HG00328=0|0	0.600988	HG00328=0|0	HG00328=0|0
HG00329	114.697	HG00329=0|0	HG00329=0|0	0.345908	HG00329=0|0	HG00329=0|0
HG00330	143.308	HG00330=0|0	HG00330=0|0	0.362277	HG00330=0|0	HG00330=0|0
HG00331	171.542	HG00331=0|0	HG00331=0|0	0.547796	HG00331=0|0	HG00331=0|0
HG00332	275.233	HG00332=0|0	HG00332=0|0	0.944921	HG00332=0|0	HG00332=0|0
HG00334	279.099	HG00334=0|0	HG00334=0|0	1.15859	HG00334=0|0	HG00334=0|0
HG00335	249.601	HG00335=0|0	HG00335=0|0	1.20017	HG00335=0|0	HG00335=0|0
HG00336	166.404	HG00336=0|0	HG00336=0|0	0.826177	HG00336=0|0	HG00336=0|0
HG00337	148.691	HG00337=0|0	HG00337=0|0	0.42632	HG00337=0|0	HG00337=0|0
HG00338	228.268	HG00338=0|0	HG00338=0|0	0.625718	HG00338=0|0	HG00338=0|0
HG00339	216.726	HG00339=0|0	HG00339=0|0	0.327128	HG00339=0|0	HG00339=0|0
HG00341	138.055	HG00341=0|0	HG00341=0|0	0.956846	HG00341=0|0	HG00341=0|0
HG00342	228.786	HG00342=0|0	HG00342=0|0	0.980491	HG00342=0|0	HG00342=0|0
HG00343	235.917	HG00343=0|0	HG00343=0|0	0.522347	HG00343=0|0	HG00343=0|0
HG00344	311.139	HG00344=0|1	HG00344=0|0	0.65898	HG00344=0|0	HG00344=0|0
HG00345	244.179	HG00345=0|0	HG00345=0|0	0.415422	HG00345=0|0	HG00345=0|0
HG00346	155.355	HG00346=0|0	HG00346=0|0	0.307166	HG00346=0|0	HG00346=0|0
HG00349	220.679	HG00349=0|0	HG00349=0|0	0.503155	HG00349=0|0	HG00349=0|0
HG00350	213.696	HG00350=0|0	HG00350=0|0	0.3305	HG00350=0|0	HG00350=0|0
HG00351	266.52	HG00351=0|0	HG00351=0|0	0.769038	HG00351=0|0	HG00351=0|0
HG00353	181.105	HG00353=0|0	HG00353=0|0	0.969958	HG00353=0|0	HG00353=0|0
HG00355	225.857	HG00355=0|0	HG00355=0|0	0.417843	HG00355=0|0	HG00355=0|0
HG00356	223.561	HG00356=0|0	HG00356=0|0	0.809628	HG00356=0|0	HG00356=0|0
HG00358	121.336	HG00358=0|0	HG00358=0|0	0.610648	HG00358=0|0	HG00358=0|0
HG00359	183.842	HG00359=0|0	HG00359=0|0	0.0691541	HG00359=0|0	HG00359=0|0
HG00360	182.855	HG00360=0|0	HG00360=0|0	0.434298	HG00360=0|0	HG00360=0|0
HG00361	220.852	HG00361=0|0	HG00361=0|0	0.645395	HG00361=0|0	HG00361=0|0
HG00362	178.379	HG00362=0|0	HG00362=0|0	0.188834	HG00362=0|0	HG00362=0|0
HG00364	174.548	HG00364=0|0	HG00364=0|0	0.5493	HG00364=0|0	HG00364=0|0
HG00366	274.396	HG00366=0|0	HG00366=0|0	0.687018	HG00366=0|0	HG00366=0|0
HG00367	170.336	HG00367=0|0	HG00367=0|0	0.566512	HG00367=0|0	HG00367=0|0
HG00369	234.992	HG00369=0|0	HG00369=0|0	0.759026	HG00369=0|0	HG00369=0|0
HG00372	296.32	HG00372=0|0	HG00372=0|0	0.726042	HG00372=0|0	HG00372=0|0
HG00373	240.152	HG00373=0|0	HG00373=0|0	0.406816	HG00373=0|0	HG00373=0|0
HG00375	262.782	HG00375=0|0	HG00375=0|0	0.305547	HG00375=0|0	HG00375=0|0
HG00376	163.813	HG00376=0|0	HG00376=0|0	0.372914	HG00376=0|0	HG00376=0|0
HG00377	235.04	HG00377=0|0	HG00377=0|0	0.383334	HG00377=0|0	HG00377=0|0
HG00378	168.871	HG00378=0|0	HG00378=0|0	0.591004	HG00378=0|0	HG00378=0|0
HG00381	158.641	HG00381=0|0	HG00381=0|0	0.424137	HG00381=0|0	HG00381=0|0
HG00382	316.546	HG00382=0|0	HG00382=0|0	0.666331	HG00382=0|0	HG00382=0|0
HG00383	182.405	HG00383=0|0	HG00383=0|0	0.277162	HG00383=0|0	HG00383=0|0
HG00384	194.642	HG00384=0|0	HG00384=0|0	0.542639	HG00384=0|0	HG00384=0|0
HG01334	298.522	HG01334=0|0	HG01334=0|0	0.948315	HG01334=0|0	HG01334=0|0
NA06984	269.209	NA06984=0|0	NA06984=0|0	0.619495	NA06984=0|0	NA06984=0|0
NA06986	255.182	NA06986=0|0	NA06986=0|0	0.660976	NA06986=0|0	NA06986=0|0
NA06989	156.324	NA06989=0|0	NA06989=0|0	0.787928	NA06989=0|0	NA06989=0|0
NA06994	322.491	NA06994=0|0	NA06994=0|0	0.914151	NA06994=0|0	NA06994=0|0
NA07037	261.238	NA07037=0|0	NA07037=0|0	0.14872	NA07037=0|0	NA07037=0|0
NA07048	297.557	NA07048=0|0	NA07048=0|0	0.548316	NA07048=0|0	NA07048=0|0
NA07051	186.335	NA07051=0|0	NA07051=0|0	0.514137	NA07051=0|0	NA07051=0|0
NA07056	211.198	NA07056=0|0	NA07056=0|0	0.775674	NA07056=0|0	NA07056=0|0
NA07347	184.049	NA07347=0|0	NA07347=0|0	-0.0381882	NA07347=0|0	NA07347=0|0
NA07357	207.853	NA07357=0|0	NA07357=0|0	0.675438	NA07357=0|0	NA07357=0|0
NA10847	351.596	NA10847=0|0	NA10847=0|0	1.47292	NA10847=0|0	NA10847=0|0
NA10851	246.428	NA10851=0|0	NA10851=0|0	1.0318	NA10851=0|0	NA10851=0|0
NA11829	176.458	NA11829=0|0	NA11829=0|0	0.772345	NA11829=0|0	NA11829=0|0
NA11830	159.857	NA11830=0|0	NA11830=0|0	0.372028	NA11830=0|0	NA11830=0|0
NA11831	132.57	NA11831=0|0	NA11831=0|0	0.187854	NA11831=0|0	NA11831=0|0
NA11832	199.009	NA11843=0|0	NA11843=0|0	0.171253	NA11843=0|0	NA11843=0|0
NA11892	146.176	NA11892=0|0	NA11892=0|0	0.683538	NA11892=0|0	NA11892=0|0
NA11893	192.494	NA11893=0|0	NA11893=0|0	0.361527	NA11893=0|0	NA11893=0|0
NA11894	250.675	NA11894=0|0	NA11894=0|0	0.736919	NA11894=0|0	NA11894=0|0
NA11920	374.407	NA11920=0|0	NA11920=0|0	0.937914	NA11920=0|0	NA11920=0|0
NA11930	290.813	NA11930=0|0	NA11930=0|0	0.793245	NA11930=0|0	NA11930=0|0
NA11931	209.991	NA11931=0|0	NA11931=0|0	0.651328	NA11931=0|0	NA11931=0|0
NA11992	320.067	NA11992=0|0	NA11992=0|0	1.15801	NA11992=0|0	NA11992=0|0
NA11993	238.321	NA11993=0|0	NA11993=0|0	0.296267	NA11993=0|0	NA11993=0|0
NA11994	170.122	NA11994=0|0	NA11994=0|0	0.0278324	NA11994=0|0	NA11994=0|0
NA11995	79.5811	NA11995=0|0	NA11995=0|0	0.0850652	NA11995=0|0	NA11995=0|0
NA12004	122.52	NA12004=0|0	NA12004=0|0	0.162199	NA12004=0|0	NA12004=0|0
NA12006	98.4239	NA12006=0|0	NA12006=0|0	0.0669225	NA12006=0|0	NA12006=0|0
NA12043	236.005	NA12043=0|0	NA12043=0|0	-0.102257	NA12043=0|0	NA12043=0|0
NA12044	261.004	NA12044=0|0	NA12044=0|0	0.864781	NA12044=0|0	NA12044=0|0
NA12045	201.182	NA12045=0|0	NA12045=0|0	0.00081388	NA12045=0|0	NA12045=0|0
NA12058	190.366	NA12058=0|0	NA12058=0|0	0.976383	NA12058=0|0	NA12058=0|0
NA12144	292.635	NA12144=0|0	NA12144=0|0	0.569315	NA12144=0|0	NA12144=0|0
NA12154	145.732	NA12154=0|0	NA12154=0|0	0.158305	NA12154=0|0	NA12154=0|0
NA12155	139.059	NA12155=0|0	NA12155=0|0	-0.126681	NA12155=0|0	NA12155=0|0
NA12249	179.357	NA12249=0|0	NA12249=0|0	1.27061	NA12249=0|0	NA12249=0|0
NA12272	156.89	NA12272=0|0	NA12272=0|0	0.80826	NA12272=0|0	NA12272=0|0
NA12273	200.062	NA12273=0|0	NA12273=0|0	0.468444	NA12273=0|0	NA12273=0|0
NA12275	216.292	NA12275=0|0	NA12275=0|0	0.642366	NA12275=0|0	NA12275=0|0
NA12282	190.264	NA12282=0|0	NA12282=0|0	0.492473	NA12282=0|0	NA12282=0|0
NA12283	282.473	NA12283=0|0	NA12283=0|0	0.588691	NA12283=0|0	NA12283=0|0
NA12286	198.204	NA12286=0|0	NA12286=0|0	1.26973	NA12286=0|0	NA12286=0|0
NA12287	155.687	NA12287=0|0	NA12287=0|0	-0.357547	NA12287=0|0	NA12287=0|0
NA12340	187.585	NA12340=0|0	NA12340=0|0	1.03283	NA12340=0|0	NA12340=0|0
NA12341	239.855	NA12341=0|0	NA12341=0|0	0.95552	NA12341=0|0	NA12341=0|0
NA12342	156.677	NA12342=0|0	NA12342=0|0	0.403604	NA12342=0|0	NA12342=0|0
NA12347	252.215	NA12347=0|0	NA12347=0|0	1.16225	NA12347=0|0	NA12347=0|0
NA12348	158.342	NA12348=0|0	NA12348=0|0	0.0932371	NA12348=0|0	NA12348=0|0
NA12383	246.746	NA12383=0|0	NA12383=0|0	0.528314	NA12383=0|0	NA12383=0|0
NA12399	118.435	NA12399=0|0	NA12399=0|0	-0.207486	NA12399=0|0	NA12399=0|0
NA12400	270.266	NA12400=0|0	NA12400=0|0	0.675376	NA12400=0|0	NA12400=0|0
NA12413	233.004	NA12413=0|0	NA12413=0|0	1.14265	NA12413=0|0	NA12413=0|0
NA12489	262.52	NA12489=0|0	NA12489=0|0	0.558785	NA12489=0|0	NA12489=0|0
NA12546	193.442	NA12546=0|0	NA12546=0|0	0.631346	NA12546=0|0	NA12546=0|0
NA12716	145.632	NA12716=0|0	NA12716=0|0	0.661472	NA12716=0|0	NA12716=0|0
NA12717	158.426	NA12717=0|0	NA12717=0|0	0.471803	NA12717=0|0	NA12717=0|0
NA12718	215.957	NA12718=0|0	NA12718=0|0	0.0822408	NA12718=0|0	NA12718=0|0
NA12749	157.447	NA12749=0|0	NA12749=0|0	0.0787677	NA12749=0|0	NA12749=0|0
NA12750	241.381	NA12750=0|0	NA12750=0|0	0.486084	NA12750=0|0	NA12750=0|0
NA12751	300.658	NA12751=0|0	NA12751=0|0	0.448944	NA12751=0|0	NA12751=0|0
NA12761	173.972	NA12761=0|0	NA12761=0|0	0.363775	NA12761=0|0	NA12761=0|0
NA12763	275.053	NA12763=0|0	NA12763=0|0	0.641693	NA12763=0|0	NA12763=0|0
NA12775	148.145	NA12775=0|0	NA12775=0|0	0.799424	NA12775=0|0	NA12775=0|0
NA12777	307.403	NA12777=0|0	NA12777=0|0	1.07745	NA12777=0|0	NA12777=0|0
NA12778	279.119	NA12778=0|0	NA12778=1|0	1.68474	NA12778=0|0	NA12778=0|0
NA12812	231.396	NA12812=0|0	NA12812=0|0	0.460518	NA12812=0|0	NA12812=0|0
NA12813	137.631	NA12814=0|0	NA12814=0|0	0.0624994	NA12814=0|0	NA12814=0|0
NA12815	162.285	NA12815=0|0	NA12815=0|0	0.505326	NA12815=0|0	NA12815=0|0
NA12827	245.602	NA12827=0|0	NA12827=0|0	0.530968	NA12827=0|0	NA12827=0|0
NA12829	161.512	NA12829=0|0	NA12829=0|0	0.176081	NA12829=0|0	NA12829=0|0
NA12830	205.932	NA12830=0|0	NA12830=0|0	0.478021	NA12830=0|0	NA12830=0|0
NA12842	205.711	NA12842=0|0	NA12842=0|0	0.238313	NA12842=0|0	NA12842=0|0
NA12843	197.53	NA12843=0|0	NA12843=0|0	0.444067	NA12843=0|0	NA12843=0|0
NA12872	215.382	NA12872=0|0	NA12872=0|0	0.14386	NA12872=0|0	NA12872=0|0
NA12873	192.852	NA12873=0|0	NA12873=0|0	0.687262	NA12873=0|0	NA12873=0|0
NA12874	197.249	NA12874=0|0	NA12874=0|0	0.297712	NA12874=0|0	NA12874=0|0
NA12889	214.882	NA12889=0|0	NA12889=0|0	0.46169	NA12889=0|0	NA12889=0|0
NA12890	293.574	NA12890=0|0	NA12890=0|0	3.53477	NA12890=0|0	NA12890=0|0
NA18486	239.141	NA18486=0|0	NA18486=0|0	1.01659	NA18486=0|0	NA18486=0|0
NA18487	238.554	NA18487=0|0	NA18487=0|0	1.78096	NA18487=0|0	NA18487=0|0
NA18489	192.659	NA18489=0|0	NA18489=0|0	1.95044	NA18489=0|0	NA18489=0|0
NA18498	329.743	NA18498=0|0	NA18498=0|0	1.51206	NA18498=0|0	NA18498=0|0
NA18499	208.41	NA18499=0|0	NA18499=0|0	0.254744	NA18499=0|0	NA18499=0|0
NA18502	306.48	NA18502=0|0	NA18502=0|0	1.83658	NA18502=0|0	NA18502=0|0
NA18505	233.879	NA18505=0|0	NA18505=0|0	0.172961	NA18505=0|0	NA18505=0|0
NA18508	189.31	NA18508=0|0	NA18508=0|0	0.241272	NA18508=0|0	NA18508=0|0
NA18510	140.772	NA18510=0|0	NA18510=0|0	0.811893	NA18510=0|0	NA18510=0|0
NA18511	222.566	NA18511=0|0	NA18511=0|0	0.701915	NA18511=0|0	NA18511=0|0
NA18517	192.838	NA18517=0|0	NA18517=0|0	0.41143	NA18517=0|0	NA18517=0|0
NA18519	213.921	NA18519=0|0	NA18519=0|0	0.892058	NA18519=0|0	NA18519=0|0
NA18520	328.967	NA18520=0|0	NA18520=0|0	2.2681	NA18520=0|0	NA18520=0|0
NA18858	298.045	NA18858=0|0	NA18858=0|0	1.17385	NA18858=0|0	NA18858=0|0
NA18861	190.655	NA18861=0|0	NA18861=0|0	-0.0448925	NA18861=0|0	NA18861=0|0
NA18867	227.183	NA18867=0|0	NA18867=0|0	0.534244	NA18867=0|0	NA18867=0|0
NA18868	220.296	NA18868=0|0	NA18868=0|0	1.70994	NA18868=0|0	NA18868=0|0
NA18870	204.194	NA18870=0|0	NA18870=0|0	2.3403	NA18870=0|0	NA18870=0|0
NA18873	303.016	NA18873=0|0	NA18873=0|0	-0.0362176	NA18873=0|0	NA18873=0|0
NA18907	165.813	NA18907=0|0	NA18907=0|0	-0.394304	NA18907=0|0	NA18907=0|0
NA18908	188.511	NA18908=0|0	NA18908=0|0	0.743309	NA18908=0|0	NA18908=0|0
NA18909	321.289	NA18909=0|0	NA18909=0|0	-0.155299	NA18909=0|0	NA18909=0|0
NA18910	299.191	NA18910=0|0	NA18910=0|0	2.17489	NA18910=0|0	NA18910=0|0
NA18912	221.429	NA18912=0|0	NA18912=0|0	0.848072	NA18912=0|0	NA18912=0|0
NA18916	193.866	NA18916=0|0	NA18916=0|0	1.19491	NA18916=0|0	NA18916=0|0
NA18917	207.857	NA18917=0|0	NA18917=0|0	0.725248	NA18917=0|0	NA18917=0|0
NA18923	169.238	NA18923=0|0	NA18923=0|0	1.76939	NA18923=0|0	NA18923=0|0
NA18933	227.138	NA18933=0|0	NA18933=0|0	0.733376	NA18933=0|1	NA18933=0|0
NA18934	183.018	NA18934=0|0	NA18934=0|0	0.99394	NA18934=0|0	NA18934=0|0
NA19093	199.084	NA19093=0|0	NA19093=0|0	0.742375	NA19093=0|0	NA19093=0|0
NA19095	185.099	NA19095=0|0	NA19095=0|0	0.245489	NA19095=1|0	NA19095=0|0
NA19096	384.662	NA19096=0|0	NA19096=0|0	0.777874	NA19096=0|0	NA19096=0|0
NA19098	233.722	NA19098=0|0	NA19098=0|0	0.245087	NA19098=0|0	NA19098=0|0
NA19099	283.193	NA19099=0|0	NA19099=0|0	1.28968	NA19099=0|0	NA19099=0|0
NA19102	281.827	NA19102=0|0	NA19102=0|0	2.29628	NA19102=0|0	NA19102=0|0
NA19107	228.411	NA19107=0|0	NA19107=0|0	0.09678	NA19107=0|0	NA19107=0|0
NA19108	225.575	NA19108=0|0	NA19108=0|0	1.98697	NA19108=0|1	NA19108=0|0
NA19113	143.305	NA19113=0|0	NA19113=0|0	0.723397	NA19113=0|0	NA19113=0|0
NA19114	312.489	NA19114=0|0	NA19114=0|0	1.01282	NA19114=0|0	NA19114=0|0
NA19116	223.225	NA19116=0|0	NA19116=0|0	0.752616	NA19116=0|0	NA19116=0|0
NA19117	239.147	NA19117=0|0	NA19117=0|0	1.40387	NA19117=0|0	NA19117=0|0
NA19118	206.883	NA19118=0|0	NA19118=0|0	0.891044	NA19118=0|0	NA19118=0|0
NA19119	292.18	NA19119=0|0	NA19119=0|0	-0.0770678	NA19119=1|0	NA19119=0|0
NA19121	168.208	NA19121=0|0	NA19121=0|0	0.390278	NA19121=0|0	NA19121=0|0
NA19129	221.978	NA19129=0|0	NA19129=0|0	0.622757	NA19129=0|0	NA19129=0|0
NA19130	287.294	NA19130=0|0	NA19130=0|0	0.927304	NA19130=0|0	NA19130=0|0
NA19131	176.615	NA19131=0|0	NA19131=0|0	-0.154468	NA19131=0|0	NA19131=0|0
NA19137	173.52	NA19137=0|0	NA19137=0|0	-0.292899	NA19137=0|0	NA19137=0|0
NA19138	206.145	NA19138=0|0	NA19138=0|0	0.469028	NA19138=0|0	NA19138=0|0
NA19146	163.915	NA19146=0|0	NA19146=0|0	0.445221	NA19146=0|0	NA19146=0|0
NA19147	108.635	NA19147=0|0	NA19147=0|0	0.117086	NA19147=0|0	NA19147=0|0
NA19149	224.731	NA19149=0|0	NA19149=0|0	1.48849	NA19149=0|1	NA19149=0|0
NA19150	215.817	NA19150=0|0	NA19150=0|0	2.52365	NA19150=0|0	NA19150=0|0
NA19152	274.206	NA19152=0|0	NA19152=0|0	0.287346	NA19152=0|0	NA19152=0|0
NA19160	298.774	NA19160=0|0	NA19160=0|0	0.582078	NA19160=0|0	NA19160=0|0
NA19171	130.805	NA19171=0|0	NA19171=0|0	0.690213	NA19171=0|0	NA19171=1|0
NA19172	167.848	NA19172=0|0	NA19172=0|0	0.659444	NA19172=0|1	NA19172=0|0
NA19175	176.99	NA19175=0|0	NA19175=0|0	0.269573	NA19175=0|0	NA19175=0|0
NA19185	209.136	NA19185=0|0	NA19185=0|0	0.806905	NA19185=0|1	NA19185=0|0
NA19189	323.58	NA19189=0|0	NA19189=0|0	3.36314	NA19189=0|0	NA19189=0|0
NA19190	163.578	NA19190=0|0	NA19190=0|0	1.48335	NA19190=0|0	NA19190=0|0
NA19197	158.204	NA19197=0|0	NA19197=0|0	0.76407	NA19197=0|0	NA19197=0|0
NA19198	278.642	NA19198=0|0	NA19198=0|0	1.60307	NA19198=0|0	NA19198=0|0
NA19200	166.975	NA19200=0|0	NA19200=0|0	0.699383	NA19200=0|0	NA19200=0|0
NA19204	237.603	NA19204=0|0	NA19204=0|0	1.15549	NA19204=0|0	NA19204=0|0
NA19207	200.38	NA19207=0|0	NA19207=0|0	0.334473	NA19207=0|0	NA19207=0|0
NA19209	255.687	NA19209=0|0	NA19209=0|0	0.0869353	NA19209=0|0	NA19209=0|0
NA19213	298.824	NA19213=0|0	NA19213=0|0	0.755396	NA19213=0|0	NA19213=0|0
NA19222	239.481	NA19222=0|0	NA19222=0|0	0.317094	NA19222=0|0	NA19222=0|0
NA19223	247.746	NA19223=0|0	NA19223=0|0	1.16164	NA19223=0|0	NA19223=0|0
NA19225	165.252	NA19225=0|0	NA19225=0|0	0.760632	NA19225=0|0	NA19225=0|0
NA19235	193.877	NA19235=0|0	NA19235=0|0	1.13065	NA19235=0|0	NA19235=0|0
NA19236	333.234	NA19236=0|0	NA19236=0|0	0.918608	NA19236=0|0	NA19236=0|0
NA19247	85.7509	NA19247=0|0	NA19247=0|0	0.797042	NA19247=0|0	NA19247=0|0
NA19248	294.983	NA19248=0|0	NA19248=0|0	0.970233	NA19248=0|0	NA19248=0|0
NA19256	230.837	NA19256=0|0	NA19256=0|0	0.892846	NA19256=0|0	NA19256=0|0
NA19257	168.238	NA19257=0|0	NA19257=0|0	0.261454	NA19257=0|0	NA19257=0|0
NA20502	189.775	NA20502=0|0	NA20502=0|0	1.4067	NA20502=0|0	NA20502=0|0
NA20503	177.734	NA20503=0|0	NA20503=0|0	1.71473	NA20503=0|0	NA20503=0|0
NA20504	155.104	NA20504=0|0	NA20504=0|0	0.48709	NA20504=0|0	NA20504=0|0
NA20505	227.244	NA20505=0|0	NA20505=0|0	2.6158	NA20505=0|0	NA20505=0|0
NA20506	119.494	NA20506=0|0	NA20506=0|0	1.89619	NA20506=0|0	NA20506=0|0
NA20507	154.305	NA20507=0|0	NA20507=0|0	2.32054	NA20507=0|0	NA20507=0|0
NA20508	247.874	NA20508=0|0	NA20508=0|0	0.872116	NA20508=0|0	NA20508=0|0
NA20509	139.067	NA20509=0|0	NA20509=0|0	0.984745	NA20509=0|0	NA20509=0|0
NA20510	310.726	NA20510=0|0	NA20510=0|0	1.0728	NA20510=0|0	NA20510=0|0
NA20512	200.983	NA20512=0|0	NA20512=0|0	1.86085	NA20512=0|0	NA20512=0|0
NA20513	114.091	NA20513=0|0	NA20513=0|0	1.75087	NA20513=0|0	NA20513=0|0
NA20515	157.958	NA20515=0|0	NA20515=0|0	0.848958	NA20515=0|0	NA20515=0|0
NA20516	223.916	NA20516=0|0	NA20516=0|0	0.718052	NA20516=0|0	NA20516=0|0
NA20517	252.843	NA20517=0|0	NA20517=0|0	0.869512	NA20517=0|0	NA20517=0|0
NA20518	221.847	NA20518=0|0	NA20518=0|0	0.40802	NA20518=0|0	NA20518=0|0
NA20519	172.39	NA20519=0|0	NA20519=0|0	0.504607	NA20519=0|0	NA20519=0|0
NA20520	139.162	NA20520=0|0	NA20520=0|0	0.99733	NA20520=0|0	NA20520=0|0
NA20521	177.809	NA20521=0|0	NA20521=0|0	0.634035	NA20521=0|0	NA20521=0|0
NA20524	184.553	NA20524=0|0	NA20524=0|0	0.752949	NA20524=0|0	NA20524=0|0
NA20525	198.43	NA20525=0|0	NA20525=0|0	0.653201	NA20525=0|0	NA20525=0|0
NA20527	234.952	NA20527=0|0	NA20527=0|0	1.40193	NA20527=0|0	NA20527=0|0
NA20528	183.896	NA20528=0|0	NA20528=0|0	0.892808	NA20528=0|0	NA20528=0|0
NA20529	107.423	NA20529=0|0	NA20529=0|0	0.772653	NA20529=0|0	NA20529=0|0
NA20530	182.136	NA20530=0|0	NA20530=0|0	0.983988	NA20530=0|0	NA20530=0|0
NA20531	132.664	NA20531=0|0	NA20531=0|0	0.660177	NA20531=0|0	NA20531=0|0
NA20532	201.999	NA20532=0|0	NA20532=0|0	0.408488	NA20532=0|0	NA20532=0|0
NA20534	169.804	NA20534=0|0	NA20534=0|0	0.645228	NA20534=0|0	NA20534=0|0
NA20535	182.11	NA20535=0|0	NA20535=0|0	0.571693	NA20535=0|0	NA20535=0|0
NA20536	165.321	NA20536=0|0	NA20536=0|0	0.264375	NA20536=0|0	NA20536=0|0
NA20537	189.521	NA20537=0|0	NA20537=0|0	0.279536	NA20537=0|0	NA20537=0|0
NA20538	146.302	NA20538=0|0	NA20538=0|0	0.562518	NA20538=0|0	NA20538=0|0
NA20539	221.646	NA20539=0|0	NA20539=0|0	0.666025	NA20539=0|0	NA20539=0|0
NA20540	253.337	NA20540=0|0	NA20540=0|0	0.340812	NA20540=0|0	NA20540=0|0
NA20541	257.545	NA20541=0|0	NA20541=0|0	0.544299	NA20541=0|0	NA20541=0|0
NA20542	129.066	NA20542=0|0	NA20542=0|0	0.162151	NA20542=0|0	NA20542=0|0
NA20543	250.825	NA20543=0|0	NA20543=0|0	1.41467	NA20543=0|0	NA20543=0|0
NA20544	260.213	NA20544=0|0	NA20544=0|0	0.425677	NA20544=0|0	NA20544=0|0
NA20581	122.093	NA20581=0|0	NA20581=0|0	0.864019	NA20581=0|0	NA20581=0|0
NA20582	286.75	NA20582=0|0	NA20582=0|0	1.20642	NA20582=0|0	NA20582=0|0
NA20585	165.654	NA20585=0|0	NA20585=0|0	0.275206	NA20585=0|0	NA20585=0|0
NA20586	184.631	NA20586=0|0	NA20586=0|0	-0.0678059	NA20586=0|0	NA20586=0|0
NA20588	211.208	NA20588=0|0	NA20588=0|0	0.56454	NA20588=0|0	NA20588=0|0
NA20589	202.531	NA20589=0|0	NA20589=0|0	0.41844	NA20589=0|0	NA20589=0|0
NA20752	159.893	NA20752=0|0	NA20752=0|0	0.999767	NA20752=0|0	NA20752=0|0
NA20754	253.146	NA20754=0|0	NA20754=0|0	0.908603	NA20754=0|0	NA20754=0|0
NA20756	252.443	NA20756=0|0	NA20756=0|0	0.942735	NA20756=0|0	NA20756=0|0
NA20757	211.4	NA20757=0|0	NA20757=0|0	0.632164	NA20757=0|0	NA20757=0|0
NA20758	230.023	NA20758=0|0	NA20758=0|0	0.796073	NA20758=0|0	NA20758=0|0
NA20759	175.781	NA20759=0|0	NA20759=0|0	0.529906	NA20759=0|0	NA20759=0|0
NA20760	231.436	NA20760=0|0	NA20760=0|0	0.440441	NA20760=0|0	NA20760=0|0
NA20761	106.323	NA20761=0|0	NA20761=0|0	0.347631	NA20761=0|0	NA20761=0|0
NA20765	186.044	NA20765=0|0	NA20765=0|0	2.29238	NA20765=0|0	NA20765=0|0
NA20766	210.273	NA20766=0|0	NA20766=0|0	-0.10939	NA20766=0|0	NA20766=0|0
NA20768	163.869	NA20768=0|0	NA20768=0|0	0.66899	NA20768=0|0	NA20768=0|0
NA20769	173.459	NA20769=0|0	NA20769=0|0	0.74171	NA20769=0|0	NA20769=0|0
NA20770	154.938	NA20770=0|0	NA20770=0|0	0.741474	NA20770=0|0	NA20770=0|0
NA20771	300.688	NA20771=0|0	NA20771=0|0	0.982452	NA20771=0|0	NA20771=0|0
NA20772	203.055	NA20772=0|0	NA20772=0|0	0.789681	NA20772=0|0	NA20772=0|0
NA20773	139.043	NA20773=0|0	NA20773=0|0	0.807428	NA20773=0|0	NA20773=0|0
NA20774	116.591	NA20774=0|0	NA20774=0|0	1.07456	NA20774=0|0	NA20774=0|0
NA20778	185.043	NA20778=0|0	NA20778=0|0	3.32864	NA20778=0|0	NA20778=0|0
NA20783	265.612	NA20783=0|0	NA20783=0|0	1.29621	NA20783=0|0	NA20783=0|0
NA20785	336.945	NA20785=0|0	NA20785=0|0	0.0109034	NA20785=0|0	NA20785=0|0
NA20786	297.159	NA20786=0|0	NA20786=0|0	0.149845	NA20786=0|0	NA20786=0|0
NA20787	176.153	NA20787=0|0	NA20787=0|0	0.621339	NA20787=0|0	NA20787=0|0
NA20790	225.258	NA20790=0|0	NA20790=0|0	1.16665	NA20790=0|0	NA20790=0|0
NA20792	263.6	NA20792=0|0	NA20792=0|0	0.817694	NA20792=0|0	NA20792=0|0
NA20795	121.761	NA20795=0|0	NA20795=0|0	0.359829	NA20795=0|0	NA20795=0|0
NA20796	247.617	NA20796=0|0	NA20796=0|0	0.448769	NA20796=0|0	NA20796=0|0
NA20797	107.096	NA20797=0|0	NA20797=0|0	0.452976	NA20797=0|0	NA20797=0|0
NA20798	192.255	NA20798=0|0	NA20798=0|0	0.300652	NA20798=0|0	NA20798=0|0
NA20799	159.397	NA20799=0|0	NA20799=0|0	0.986305	NA20799=0|0	NA20799=0|0
NA20800	168.559	NA20800=0|0	NA20800=0|0	0.336133	NA20800=0|0	NA20800=0|0
NA20801	211.689	NA20801=0|0	NA20801=0|0	0.489564	NA20801=0|0	NA20801=0|0
NA20802	172.88	NA20802=0|0	NA20802=0|0	0.324746	NA20802=0|0	NA20802=0|0
NA20803	207.285	NA20803=0|0	NA20803=0|0	0.929646	NA20803=0|0	NA20803=0|0
NA20804	304.907	NA20804=0|0	NA20804=0|0	0.29333	NA20804=0|0	NA20804=0|0
NA20805	220.952	NA20805=0|0	NA20805=0|0	0.917399	NA20805=0|0	NA20805=0|0
NA20806	216.752	NA20806=0|0	NA20806=0|0	0.953435	NA20806=0|0	NA20806=0|0
NA20807	181.852	NA20807=0|0	NA20807=0|0	0.0142119	NA20807=0|0	NA20807=0|0
NA20808	271.933	NA20808=0|0	NA20808=0|0	0.878425	NA20808=0|0	NA20808=0|0
NA20809	178.174	NA20809=0|0	NA20809=0|0	0.554224	NA20809=0|0	NA20809=0|0
NA20810	318.815	NA20810=0|0	NA20810=0|0	1.12871	NA20810=0|0	NA20810=0|0
NA20811	253.481	NA20811=0|0	NA20811=0|0	0.60027	NA20811=0|0	NA20811=0|0
NA20812	196.857	NA20812=0|0	NA20812=0|0	1.08036	NA20812=0|0	NA20812=0|0
NA20813	165.393	NA20813=0|0	NA20813=0|0	0.273558	NA20813=0|0	NA20813=0|0
NA20814	254.02	NA20814=0|0	NA20814=0|0	1.36776	NA20814=0|0	NA20814=0|0
NA20815	178.121	NA20815=0|0	NA20815=0|0	0.309657	NA20815=0|0	NA20815=0|0
NA20816	148.951	NA20816=0|0	NA20816=0|0	0.54539	NA20816=0|0	NA20816=0|0
NA20819	237.751	NA20819=0|0	NA20819=0|0	0.447472	NA20819=0|0	NA20819=0|0
NA20826	211.838	NA20826=0|0	NA20826=0|0	0.980761	NA20826=0|0	NA20826=0|0
NA20828	196.559	NA20828=0|0	NA20828=0|0	0.768313	NA20828=0|0	NA20828=0|0
